# Supplementary material
Source: Springer Nature journal article supplement (https://www.springermedizin.de/resource/supplementary/13000_2012_659_MOESM2_ESM.pdf/9624864)

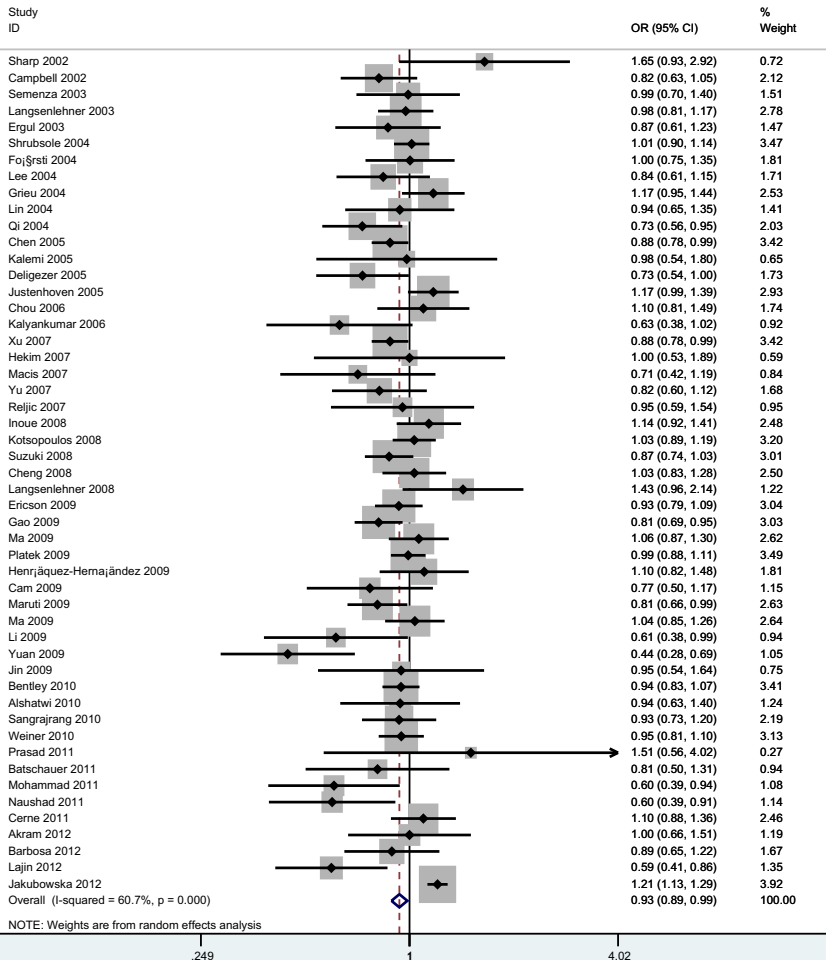

.249

1

4.02

Supplement: MOESM2 [file 9624864]
